# Supplementary material for: Proton pump inhibitors reduce the survival of advanced lung cancer patients with therapy of gefitinib or erlotinib
Source: PubMed Central journal article supplement (PMC9054789; doi:10.1038/s41598-022-10938-x), 2022-04-29
Supplement: 41598_2022_10938_MOESM1_ESM.pdf [file 41598_2022_10938_MOESM1_ESM.pdf]

**Proton Pump Inhibitors Reduce the Survival of Advanced Lung Cancer Patients with Therapy of Gefitinib or Erlotinib**

Chia-Han Lee, Mei-Chiou Shen, Ming-Ju Tsai, Jung San Chang, Yaw-Bin Huang, Yi-Hsin Yang, Kun-Pin Hsieh\*

Supplementary Table 1 Primary analysis and sensitivity analysis of overall survival (OS) and time to next treatment (TTNT) in the gefitinib cohort

| Variable      | Primary analysis    |              |         |                        |              |         | Sensitivity analysis   |              |         |
|---------------|---------------------|--------------|---------|------------------------|--------------|---------|------------------------|--------------|---------|
|               | Univariate analysis |              |         | Multivariable analysis |              |         | Multivariable analysis |              |         |
|               | HR                  | 95% CI       | p       | HR                     | 95% CI       | p       | HR                     | 95% CI       | p       |
| <b>OS</b>     |                     |              |         |                        |              |         |                        |              |         |
| Non-user      | 1.00                |              |         | 1.00                   |              |         | 1.00                   |              |         |
| H2RA          | 1.19                | (1.10– 1.29) | <0.0001 | 1.14                   | (1.05– 1.24) | 0.003   | 1.16                   | (1.06– 1.27) | 0.002   |
| PPI           | 1.50                | (1.37– 1.65) | <0.0001 | 1.58                   | (1.42– 1.76) | <0.0001 | 1.65                   | (1.47– 1.86) | <0.0001 |
| Female        | 1.00                |              |         | 1.00                   |              |         | 1.00                   |              |         |
| Male sex      | 1.26                | (1.18– 1.35) | <0.0001 | 1.62                   | (1.30– 2.01) | <0.0001 | 1.63                   | (1.31– 2.04) | <0.0001 |
| Age 20–65     | 1.00                |              |         | 1.00                   |              |         | 1.00                   |              |         |
| Age ≥65       | 1.41                | (1.32– 1.50) | <0.0001 | 2.42                   | (1.92– 3.06) | <0.0001 | 2.51                   | (1.97– 3.20) | <0.0001 |
| Stage IIIB    | 1.00                |              |         | 1.00                   |              |         | 1.00                   |              |         |
| Stage IV      | 1.73                | (1.45– 2.07) | <0.0001 | 1.70                   | (1.42– 2.03) | <0.0001 | 1.67                   | (1.38– 2.01) | <0.0001 |
| ECOG 0–1      | 1.00                |              |         | 1.00                   |              |         | 1.00                   |              |         |
| ECOG 2        | 1.93                | (1.77– 2.11) | <0.0001 | 1.75                   | (1.60– 1.92) | <0.0001 | 1.74                   | (1.58– 1.91) | <0.0001 |
| ECOG >2       | 3.20                | (2.88– 3.56) | <0.0001 | 4.60                   | (3.51– 6.03) | <0.0001 | 4.37                   | (3.30– 5.80) | <0.0001 |
| Non-smokers   | 1.00                |              |         | 1.00                   |              |         | 1.00                   |              |         |
| Smokers       | 1.25                | (1.15– 1.35) | <0.0001 | 1.07                   | (0.97– 1.19) | 0.158   | 1.08                   | (0.97– 1.20) | 0.142   |
| CCI score 0   | 1.00                |              |         | 1.00                   |              |         | 1.00                   |              |         |
| CCI score 1   | 1.11                | (1.03– 1.20) | 0.006   | 0.99                   | (0.91– 1.07) | 0.733   | 0.99                   | (0.91– 1.07) | 0.774   |
| CCI score ≥ 2 | 1.45                | (1.33– 1.58) | <0.0001 | 1.22                   | (1.12– 1.34) | <0.0001 | 1.22                   | (1.11– 1.34) | <0.0001 |
| PUD           | 0.92                | (0.83– 1.01) | 0.066   | 0.56                   | (0.41– 0.76) | 0.0003  | 0.58                   | (0.42– 0.81) | 0.001   |
| BSA <1.6      | 1.00                |              |         | 1.00                   |              |         | 1.00                   |              |         |
| BSA ≥1.6      | 0.89                | (0.83– 0.95) | 0.001   | 0.81                   | (0.75– 0.87) | <0.0001 | 0.80                   | (0.74– 0.87) | <0.0001 |
| Steroids DDD  | 1.01                | (1.01– 1.01) | <0.0001 | 1.00                   | (1.00– 1.01) | 0.0001  | 1.00                   | (1.00– 1.01) | 0.0003  |
| <b>TTNT</b>   |                     |              |         |                        |              |         |                        |              |         |
| Non-user      | 1.00                |              |         | 1.00                   |              |         | 1.00                   |              |         |
| H2RA          | 0.88                | (0.82– 0.95) | 0.001   | 0.92                   | (0.85– 1.00) | 0.049   | 0.94                   | (0.86– 1.02) | 0.135   |
| PPI           | 1.13                | (1.04– 1.24) | 0.006   | 1.37                   | (1.24– 1.52) | <0.0001 | 1.53                   | (1.37– 1.72) | <0.0001 |
| Female        | 1.00                |              |         | 1.00                   |              |         | 1.00                   |              |         |
| Male sex      | 1.20                | (1.12– 1.28) | <0.0001 | 1.25                   | (1.15– 1.36) | <0.0001 | 1.23                   | (1.13– 1.34) | <0.0001 |
| Age 20–65     | 1.00                |              |         | 1.00                   |              |         | 1.00                   |              |         |
| Age ≥65       | 1.00                | (0.94– 1.06) | 1.000   | 0.91                   | (0.85– 0.97) | 0.006   | 0.91                   | (0.85– 0.97) | 0.007   |
| Stage IIIB    | 1.00                |              |         | 1.00                   |              |         | 1.00                   |              |         |
| Stage IV      | 1.78                | (1.52– 2.09) | <0.0001 | 1.66                   | (1.41– 1.95) | <0.0001 | 1.65                   | (1.39– 1.96) | <0.0001 |
| ECOG 0–1      | 1.00                |              |         | 1.00                   |              |         | 1.00                   |              |         |
| ECOG 2        | 1.39                | (1.28– 1.52) | <0.0001 | 1.38                   | (1.27– 1.51) | <0.0001 | 1.38                   | (1.26– 1.52) | <0.0001 |
| ECOG >2       | 1.90                | (1.71– 2.10) | <0.0001 | 3.17                   | (2.49– 4.03) | <0.0001 | 3.03                   | (2.35– 3.90) | <0.0001 |

|                    |      |              |         |      |              |         |      |                      |
|--------------------|------|--------------|---------|------|--------------|---------|------|----------------------|
| Non-smokers        | 1.00 |              |         | 1.00 |              |         | 1.00 |                      |
| Smokers            | 1.13 | (1.04– 1.22) | 0.003   | 0.98 | (0.89– 1.08) | 0.717   | 0.99 | (0.89– 1.09) 0.785   |
| CCI score 0        | 1.00 |              |         | 1.00 |              |         | 1.00 |                      |
| CCI score 1        | 0.98 | (0.91– 1.05) | 0.488   | 0.97 | (0.90– 1.04) | 0.343   | 0.95 | (0.88– 1.03) 0.225   |
| CCI score $\geq$ 2 | 1.05 | (0.97– 1.14) | 0.208   | 1.07 | (0.99– 1.17) | 0.106   | 1.09 | (0.99– 1.19) 0.075   |
| PUD                | 0.71 | (0.65– 0.78) | <0.0001 | 0.45 | (0.33– 0.60) | <0.0001 | 0.47 | (0.34– 0.64) <0.0001 |
| BSA <1.6           | 1.00 |              |         | 1.00 |              |         | 1.00 |                      |
| BSA $\geq$ 1.6     | 0.95 | (0.89– 1.01) | 0.083   | 0.87 | (0.81– 0.93) | <0.0001 | 0.88 | (0.81– 0.94) 0.001   |
| Steroids cDDD      | 1.00 | (1.00– 1.01) | <0.0001 | 1.01 | (1.00– 1.01) | <0.0001 | 1.00 | (1.00– 1.01) <0.0001 |

Notes: 1. The hazard ratio of the ECOG missing and smoking missing categories was not shown.

2. Year of diagnosis, geographic region, and insurance income ranks were also adjusted.

Abbreviations: AS = acid-suppression agents; PPI = proton pump inhibitor; ECOG PS= Eastern Cooperative Oncology Group performance status; CCI = Charlson Comorbidity Index; BSA = Body Surface Area; PUD = peptic ulcer disease; cDDD = cumulative Defined Daily Doses

Supplementary Table 2 Primary analysis and sensitivity analysis of overall survival (OS) and time to next treatment (TTNT) in the erlotinib cohort

| Variable      | Primary analysis    |              |         |                        |              |         | Sensitivity analysis   |              |         |
|---------------|---------------------|--------------|---------|------------------------|--------------|---------|------------------------|--------------|---------|
|               | Univariate analysis |              |         | Multivariable analysis |              |         | Multivariable analysis |              |         |
|               | HR                  | 95% CI       | p       | HR                     | 95% CI       | p       | HR                     | 95% CI       | p       |
| <b>OS</b>     |                     |              |         |                        |              |         |                        |              |         |
| Non-user      | 1.00                |              |         | 1.00                   |              |         | 1.00                   |              |         |
| H2RA          | 1.16                | (1.02– 1.32) | 0.027   | 1.00                   | (0.87– 1.15) | 0.992   | 0.96                   | (0.83– 1.12) | 0.613   |
| PPI           | 1.53                | (1.32– 1.76) | <0.0001 | 1.54                   | (1.31– 1.82) | <0.0001 | 1.56                   | (1.30– 1.88) | <0.0001 |
| Female        | 1.00                |              |         | 1.00                   |              |         | 1.00                   |              |         |
| Male sex      | 1.17                | (1.05– 1.30) | 0.006   | 1.41                   | (1.00– 2.00) | 0.051   | 1.40                   | (0.97– 2.02) | 0.071   |
| Age 20–65     | 1.00                |              |         | 1.00                   |              |         | 1.00                   |              |         |
| Age ≥65       | 1.47                | (1.31– 1.64) | <0.0001 | 3.29                   | (2.24– 4.83) | <0.0001 | 3.27                   | (2.18– 4.90) | <0.0001 |
| Stage IIIB    | 1.00                |              |         | 1.00                   |              |         | 1.00                   |              |         |
| Stage IV      | 1.49                | (1.07– 2.07) | 0.017   | 1.58                   | (1.13– 2.19) | 0.007   | 1.65                   | (1.15– 2.35) | 0.006   |
| ECOG 0–1      | 1.00                |              |         | 1.00                   |              |         | 1.00                   |              |         |
| ECOG 2        | 2.11                | (1.81– 2.46) | <0.0001 | 2.02                   | (1.72– 2.37) | <0.0001 | 2.02                   | (1.71– 2.39) | <0.0001 |
| ECOG >2       | 3.08                | (2.54– 3.74) | <0.0001 | 6.15                   | (3.92– 9.65) | <0.0001 | 6.20                   | (3.85– 9.96) | <0.0001 |
| Non-smokers   | 1.00                |              |         | 1.00                   |              |         | 1.00                   |              |         |
| Smokers       | 1.14                | (1.00– 1.29) | 0.052   | 1.21                   | (1.04– 1.41) | 0.014   | 1.19                   | (1.01– 1.40) | 0.033   |
| CCI score 0   | 1.00                |              |         | 1.00                   |              |         | 1.00                   |              |         |
| CCI score 1   | 1.09                | (0.95– 1.24) | 0.227   | 0.96                   | (0.83– 1.10) | 0.524   | 0.95                   | (0.82– 1.10) | 0.477   |
| CCI score ≥ 2 | 1.36                | (1.18– 1.57) | <0.0001 | 1.11                   | (0.94– 1.30) | 0.211   | 1.09                   | (0.92– 1.29) | 0.328   |
| PUD           | 0.92                | (0.79– 1.08) | 0.330   | 0.22                   | (0.12– 0.40) | <0.0001 | 0.26                   | (0.14– 0.49) | <0.0001 |
| BSA <1.6      | 1.00                |              |         | 1.00                   |              |         | 1.00                   |              |         |
| BSA ≥1.6      | 0.80                | (0.72– 0.90) | 0.0002  | 0.70                   | (0.61– 0.80) | <0.0001 | 0.72                   | (0.62– 0.82) | <0.0001 |
| Steroids DDD  | 1.01                | (1.00– 1.01) | <0.0001 | 1.01                   | (1.00– 1.01) | <0.0001 | 1.01                   | (1.00– 1.01) | <0.0001 |
| <b>TTNT</b>   |                     |              |         |                        |              |         |                        |              |         |
| Non-user      | 1.00                |              |         | 1.00                   |              |         | 1.00                   |              |         |
| H2RA          | 0.91                | (0.81– 1.02) | 0.110   | 0.83                   | (0.73– 0.94) | 0.004   | 0.80                   | (0.70– 0.92) | 0.002   |
| PPI           | 1.08                | (0.94– 1.23) | 0.288   | 1.19                   | (1.01– 1.39) | 0.033   | 1.19                   | (1.00– 1.42) | 0.049   |
| Female        | 1.00                |              |         | 1.00                   |              |         | 1.00                   |              |         |
| Male sex      | 1.07                | (0.97– 1.19) | 0.161   | 1.05                   | (0.93– 1.20) | 0.430   | 1.08                   | (0.94– 1.24) | 0.281   |
| Age 20–65     | 1.00                |              |         | 1.00                   |              |         | 1.00                   |              |         |
| Age ≥65       | 1.06                | (0.96– 1.17) | 0.266   | 1.05                   | (0.94– 1.17) | 0.419   | 1.06                   | (0.94– 1.19) | 0.358   |
| Stage IIIB    | 1.00                |              |         | 1.00                   |              |         | 1.00                   |              |         |
| Stage IV      | 1.36                | (1.02– 1.80) | 0.034   | 1.41                   | (1.06– 1.88) | 0.019   | 1.47                   | (1.08– 1.99) | 0.014   |
| ECOG 0–1      | 1.00                |              |         | 1.00                   |              |         | 1.00                   |              |         |
| ECOG 2        | 1.44                | (1.25– 1.68) | <0.0001 | 1.42                   | (1.22– 1.66) | <0.0001 | 1.43                   | (1.22– 1.68) | <0.0001 |
| ECOG >2       | 1.92                | (1.59– 2.32) | <0.0001 | 3.51                   | (2.41– 5.12) | <0.0001 | 3.77                   | (2.53– 5.60) | <0.0001 |

|                    |                   |         |                   |         |                   |         |  |
|--------------------|-------------------|---------|-------------------|---------|-------------------|---------|--|
| Non-smokers        | 1.00              |         | 1.00              |         | 1.00              |         |  |
| Smokers            | 1.16 (1.03– 1.30) | 0.016   | 1.22 (1.06– 1.40) | 0.005   | 1.17 (1.01– 1.36) | 0.035   |  |
| CCI score 0        | 1.00              |         | 1.00              |         | 1.00              |         |  |
| CCI score 1        | 1.08 (0.96– 1.22) | 0.223   | 1.06 (0.93– 1.20) | 0.377   | 1.03 (0.90– 1.18) | 0.636   |  |
| CCI score $\geq$ 2 | 1.08 (0.95– 1.24) | 0.240   | 1.09 (0.94– 1.26) | 0.251   | 1.11 (0.95– 1.29) | 0.200   |  |
| PUD                | 0.75 (0.65– 0.87) | 0.0001  | 0.44 (0.28– 0.70) | 0.001   | 0.54 (0.33– 0.88) | 0.012   |  |
| BSA <1.6           | 1.00              |         | 1.00              |         | 1.00              |         |  |
| BSA $\geq$ 1.6     | 0.88 (0.79– 0.98) | 0.016   | 0.88 (0.73– 1.07) | 0.212   | 0.83 (0.73– 0.94) | 0.003   |  |
| Steroids cDDD      | 1.00 (1.00– 1.01) | <0.0001 | 1.01 (1.00– 1.01) | <0.0001 | 1.01 (1.01– 1.01) | <0.0001 |  |

Notes: 1. The hazard ratio of the ECOG missing and smoking missing categories was not shown.

2. Year of diagnosis, geographic region, and insurance income ranks were also adjusted.

Abbreviations: AS = acid-suppression agents; PPI = proton pump inhibitor; ECOG PS= Eastern Cooperative Oncology Group performance status; CCI = Charlson Comorbidity Index; BSA = Body Surface Area; PUD = peptic ulcer disease; cDDD = cumulative Defined Daily Doses

Supplementary Table 3 ATC codes of chemotherapy

| <b>Agent</b> | <b>ATC code</b> |
|--------------|-----------------|
| Bevacizumab  | L01XC07         |
| Carboplatin  | L01XA02         |
| Cisplatin    | L01XA01         |
| Docetaxel    | L01CD02         |
| Etoposide    | L01CB01         |
| Gemcitabine  | L01BC05         |
| Paclitaxel   | L01CD01         |
| Pemetrexed   | L01BA04         |
| Tegafur      | L01BC03         |
| TS-1         | L01BC53         |
| Vinorelbine  | L01CA04         |

Supplementary Table 4 ATC codes of acid-suppression agent

| <b>Agent</b>    | <b>ATC code</b> |
|-----------------|-----------------|
| PPI             |                 |
| Omeprazole      | A02BC01         |
| Pantoprazole    | A02BC02         |
| Lansoprazole    | A02BC03         |
| Rabeprazole     | A02BC04         |
| Esomeprazole    | A02BC05         |
| Dexlansoprazole | A02BC06         |
| H2RA            |                 |
| Cimetidine      | A02BA01         |
| Ranitidine      | A02BA02         |
| Famotidine      | A02BA03         |
| Nizatidine      | A02BA04         |
